# Supplementary material
Source: MDPI journal article supplement (https://www.mdpi.com/2073-4395/13/6/1605)
Supplement: s1 [file s1]

## Supplementary materials

### Tables

**Table S1.** An individual site summary of mean squares and their significant levels for agronomic traits under observation at eight sites for the single cross hybrids evaluated during the 2017-19

| Site                | Traits                  |                        |                        |                          |                        |                       |                         |                        |
|---------------------|-------------------------|------------------------|------------------------|--------------------------|------------------------|-----------------------|-------------------------|------------------------|
|                     | GY (tha <sup>-1</sup> ) | AD (days)              | ASI (days)             | EPO (cm)                 | HC (%)                 | ER (%)                | ET (score 1-5)          | GLS (score 1-5)        |
| CIMMYT-Harare (OPT) | 4.8972 <sup>ns</sup>    | 20.639 <sup>***</sup>  | 2.7703 <sup>***</sup>  | 0.002201 <sup>***</sup>  | 282.22 <sup>ns</sup>   | 74.799 <sup>ns</sup>  | 0.244717 <sup>***</sup> | 0.61465 <sup>***</sup> |
| Ratray Anold (OPT)  | 4.6843 <sup>*</sup>     | 0                      | 0                      | 0.0028976 <sup>**</sup>  | 676.92 <sup>***</sup>  | 28.6705 <sup>**</sup> | 0                       | 0                      |
| Kadoma (RS)         | 9.3381 <sup>***</sup>   | 0                      | 0                      | 0.0036062 <sup>***</sup> | 105.199 <sup>*</sup>   | 115.83 <sup>*</sup>   | 0                       | 0                      |
| CIMMYT-Harare (DIS) | 15.7051 <sup>**</sup>   | 10.6477 <sup>***</sup> | 4.1054 <sup>**</sup>   | 0.0053394 <sup>***</sup> | 455.45 <sup>***</sup>  | 257.39 <sup>**</sup>  | 0.22959 <sup>***</sup>  | 0.87737 <sup>***</sup> |
| CIMMYT-Harare (LN)  | 14.0738 <sup>**</sup>   | 7.0626 <sup>ns</sup>   | 3.2910 <sup>ns</sup>   | 0.0034241 <sup>ns</sup>  | 124.904 <sup>***</sup> | 106.226 <sup>ns</sup> | 0.15871 <sup>*</sup>    | 0.66934 <sup>***</sup> |
| Chiredzi (MDS)      | 0.4176 <sup>ns</sup>    | 21.227 <sup>**</sup>   | 15.2632 <sup>***</sup> | 0.0058219 <sup>***</sup> | 59.707 <sup>ns</sup>   | 0                     | 0                       | 0                      |
| CIMMYT-Harare (HD)  | 12.951 <sup>ns</sup>    | 6.7901 <sup>*</sup>    | 2.5495 <sup>ns</sup>   | 0.0033037 <sup>**</sup>  | 95.859 <sup>ns</sup>   | 65.723 <sup>ns</sup>  | 0.192695 <sup>***</sup> | 0.39333 <sup>***</sup> |
| Chibero (SS)        | 5.5924 <sup>***</sup>   | 24.1284 <sup>***</sup> | 5.4342 <sup>*</sup>    | 0.004954 <sup>***</sup>  | 71.271 <sup>*</sup>    | 26.5736 <sup>*</sup>  | 0                       | 0                      |

winter and summer seasons in Zimbabwe.

<sup>\*\*\*</sup>Significant at 0.05, 0.01 and 0.001 probability levels, respectively. GY= grain yield; AD= anthesis date; ASI= anthesis silking interval; EPO= ear position; HC= husk cover; ER= ear rots; ET= northern leaf blight disease; GLS= grey leaf spot disease.

**Table S2.** Local and exotic lines mated using the partial diallel mating design during the 2016 winter season in Zimbabwe.

| Parental number | Name      | Genetic background                   | Genetic background | GCA       | GCA Rank |
|-----------------|-----------|--------------------------------------|--------------------|-----------|----------|
| P1              | CL115324  | Pedigree start = STAL x Temperate    | Temperate (T)      | 0.390**   | 5        |
| P2              | CL1210884 | Pedigree start = STAL x Temperate    | Temperate (T)      | 0.789***  | 1        |
| P3              | DJ-154    | Pedigree start = STAL x Temperate    | Temperate (T)      | -0.484*** | 12       |
| P4              | CL1210969 | Pedigree start = STAL x Temperate    | Temperate (T)      | 0.009     | 6        |
| P5              | C1008-1   | Pedigree start = STAL x Tropical     | Tropical (E)       | -0.066    | 7        |
| P6              | CL1211291 | Pedigree start = STAL x Sub-tropical | Sub-tropical (S)   | 0.643***  | 2        |
| P7              | CL1211293 | Pedigree start = STAL x Sub-tropical | Sub-tropical (S)   | 0.468***  | 3        |
| P8              | CL1212428 | Pedigree start = STAL x Tropical     | Sub-tropical (S)   | -0.505**  | 13       |
| P9              | CL1214868 | Pedigree start = STAL x STAL         | Local (L)          | -0.346*   | 11       |
| P10             | CL1210571 | Pedigree start = STAL x STAL         | Local (L)          | 0.446**   | 4        |
| P11             | CL1310262 | Pedigree start = STAL x STAL         | Local (L)          | -0.186    | 8        |
| P12             | DJ9-5     | Pedigree start = STAL x STAL         | Local (L)          | -0.293*   | 10       |
| P13             | DJ9-1     | Pedigree start = STAL x STAL         | Local (L)          | -0.577*** | 14       |
| P14             | CML444    | Pedigree start = STAL x STAL         | Local (L)          | -0.288*   | 9        |

\*, \*\*, \*\*\* Significant at 0.05, 0.01 and 0.001 probability levels, respectively.
